# Supplementary material
Source: HighWire-hosted journal article supplement (https://bmjophth.bmj.com/content/8/1/e001423)
Supplement: inline-supplementary-material-1 [file inline-supplementary-material-1.pdf]

## Supplemental figure

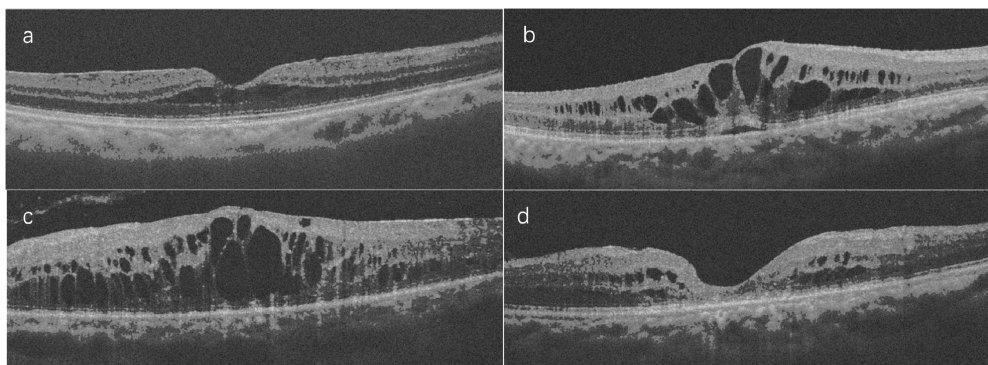

Representative enhanced optical coherence tomography images: a. early diabetic macular edema (DME). b. advanced DME. c. severe DME. d. atrophic maculopathy.

| Supplemental table AUC and F1 score of our model in validation dataset |        |              |
|------------------------------------------------------------------------|--------|--------------|
| DM stages                                                              | AUC    | F1 score (%) |
| Early DME                                                              | 0.9607 | 87.74        |
| Advanced DME                                                           | 0.9542 | 84.06        |
| Severe DME                                                             | 0.8703 | 88.18        |
| Atrophic maculopathy                                                   | 0.9770 | 88.57        |

DM: diabetic maculopathy; DME: diabetic macular edema; AUC: area under the receiver operating characteristic curve
